# Supplementary material
Source: publisher figshare collection journal article supplement (https://acs.figshare.com/ndownloader/files/13998533)
Supplement: Supplementary file 1 [file 13998533]

## Supporting Information

### Visible-to-Near-Infrared Light-Driven Photocatalytic Hydrogen Production Using Dibenzo-BODIPY and Phenothiazine Conjugate as Organic Photosensitizer

Okta Suryani,<sup>†</sup> Yuta Higashino,<sup>†</sup> Haruka Sato,<sup>†</sup> and Yuji Kubo<sup>\*†,‡</sup>

<sup>†</sup>Department of Applied Chemistry for Environment, Graduate School of Urban Environmental Sciences, Tokyo Metropolitan University, 1-1 Minami-Osawa, Hachioji, Tokyo 192-0397, Japan

<sup>‡</sup>Research Center for Hydrogen Energy Society, Tokyo Metropolitan University, 1-1 Minami-Osawa, Hachioji, Tokyo, 192-0397 Japan

\*Corresponding author: yujik@tmu.ac.jp

#### Table of Contents

|                                                                                                                                    |      |
|------------------------------------------------------------------------------------------------------------------------------------|------|
| Synthesis of <b>1</b> and the structure assignment                                                                                 | S-2  |
| <b>Scheme S1.</b> Synthetic route to <b>1</b> .                                                                                    | S-2  |
| <b>Figure S1.</b> Absorption spectra of <b>1</b> in THF measured before and after the dye deposition.                              | S-3  |
| <b>Table S1.</b> Calculation data of <b>1</b> and <b>2</b> .                                                                       | S-3  |
| <b>Figure S2.</b> Absorption and fluorescence spectra of <b>1</b> in THF.                                                          | S-3  |
| <b>Figure S3.</b> Cyclic voltammogram of <b>2</b> in THF.                                                                          | S-4  |
| <b>Figure S4.</b> Nitrogen adsorption/desorption isotherms and BJH plot of the HPT500.                                             | S-4  |
| <b>Figure S5.</b> HAADF-STEM and TEM images of Pt/HPT500.                                                                          | S-4  |
| <b>Figure S6.</b> Nitrogen adsorption/desorption isotherms of Pt/HPT500 and Pt/HPT500/ <b>1</b>                                    | S-5  |
| <b>Figure S7.</b> O 1s peak of photocatalysts.                                                                                     | S-5  |
| <b>Figure S8.</b> FE-SEM images of Pt/HPT500/ <b>1</b> .                                                                           | S-6  |
| <b>Figure S9.</b> A photograph of the photoreactor.                                                                                | S-6  |
| <b>Figure S10.</b> Gas chromatogram.                                                                                               | S-6  |
| <b>Figure S11.</b> Calibration curve.                                                                                              | S-7  |
| <b>Table S2.</b> Photocatalytic activity of Pt/HPT500/ <b>1</b> and Pt/HPT500/ <b>2</b> .                                          | S-7  |
| <b>Figure S12.</b> Photocatalytic activity of Pt/HPT500/ <b>1</b> in phosphate buffer solution at pH 7.2.                          | S-7  |
| <b>Figure S13.</b> Photocatalytic activity of Pt/HPT500/ <b>1</b> under 20-h irradiation.                                          | S-8  |
| <b>Figure S14.</b> Plots of hydrogen evolved over Pt/HPT500/ <b>2</b> upon 10-h irradiation using 300 W Xe lamp                    | S-8  |
| <b>Figure S15.</b> Photocatalytic activity of Pt/P25/ <b>1</b> in the presence of ascorbic acid.                                   | S-8  |
| <b>Table S3.</b> Hydrogen production of Pt/HPT500/ <b>1</b> , Pt/P25/ <b>1</b> , and Pt/ HPT500/ <b>2</b> .                        | S-9  |
| <b>Figure S16.</b> Reported metal-free organic photosensitizers for DSP system.                                                    | S-9  |
| <b>Table S4.</b> Photocatalytic activity in comparison with the reported systems.                                                  | S-10 |
| <b>Figure S17.</b> <sup>1</sup> H NMR spectrum of <b>1</b> in DMSO- <i>d</i> <sub>6</sub> .                                        | S-11 |
| <b>Figure S18.</b> <sup>13</sup> C NMR spectrum of <b>1</b> in DMSO- <i>d</i> <sub>6</sub> .                                       | S-12 |
| <b>Figure S19.</b> <sup>1</sup> H- <sup>13</sup> C HSQC spectrum of <b>1</b> in DMSO- <i>d</i> <sub>6</sub> in low magnetic field. | S-13 |
| <b>Figure S20.</b> ESI-MS (negative ion mode) of <b>1</b> .                                                                        | S-14 |

## Synthesis of **1** and the structure assignment

The synthetic path is shown in Scheme S1. Its structure was confirmed by NMR measurements that were recorded on a Bruker Avance 500 spectrometer ( $^1\text{H}$ : 500 MHz,  $^{13}\text{C}$ : 125 MHz). Mass spectrometry data were obtained using a Bruker microTOF II-SDT1 spectrometer with the electrospray ionization (ESI) method.

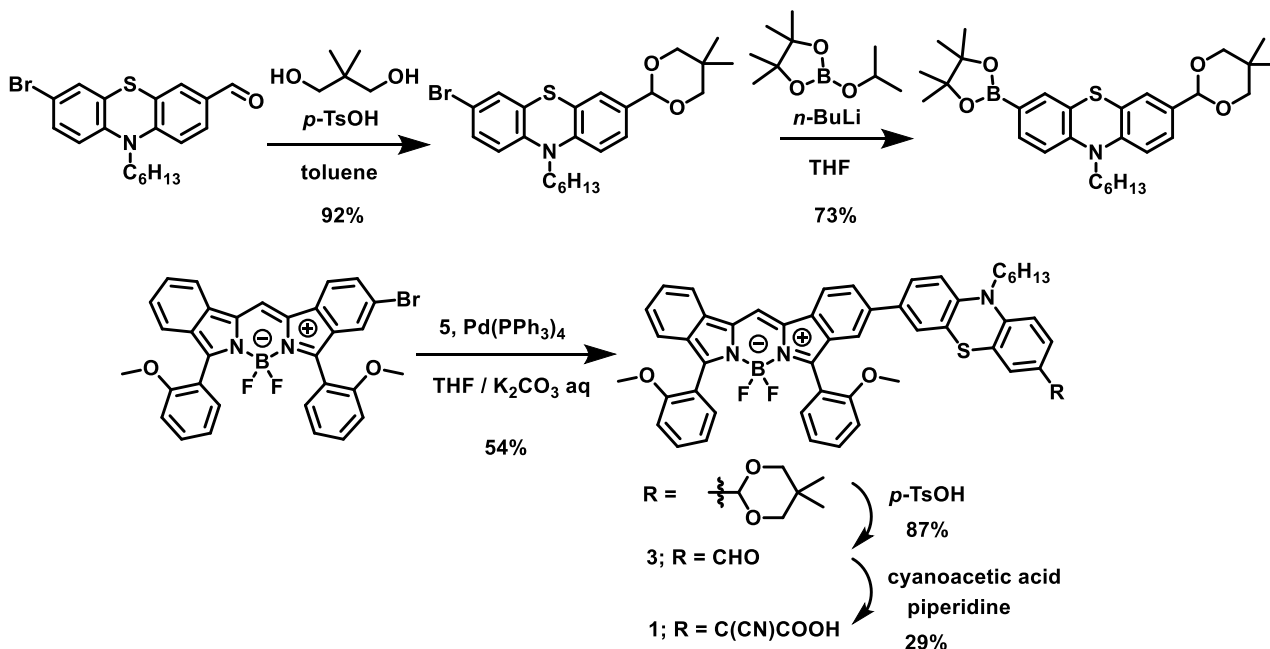

Scheme S1. Synthetic route to **1**.

*Difluoro[5-(7-(2-carboxy-2-cyanovinyl)-10-hexyl-10H-phenothiazin-3-yl)-1-[[3-(2-methoxyphenyl)-2H-isoindole-1-yl]methylene]-3-(2-methoxyphenyl)-1H-isoindolate- $N^1,N^2$ ]boron (**1**). To a dry THF solution (7.0 mL) of **3** (0.200 g, 0.246 mmol), a dry THF solution (3 mL) of 2-cyanoacetic acid (0.0428 g, 0.503 mmol) and piperidine (0.090 mL, 0.91 mM) was added. The mixture was refluxed for 42 h, during which 0.090 mL each of piperidine was added to the solution four times. The resultant solution was poured into 1 N HCl aqueous solution (100 mL) and then extracted by  $\text{CH}_2\text{Cl}_2$  and water. The organic phase was dried on  $\text{Na}_2\text{SO}_4$  and evaporated. The residue was chromatographed on silica gel (Wacogel C-300) using a gradient of  $\text{CH}_3\text{COOH}$  (0-1%) in  $\text{CH}_2\text{Cl}_2$  as an eluent to give **1** (0.0630 g) in 29% yield.*

$^1\text{H}$  NMR (500 MHz,  $\text{DMSO-}d_6$ )  $\delta$  (ppm) = 13.7 (2H, s), 8.67 (1H, s), 8.67 (1H, s), 8.21 (1H, dd,  $J$  = 8.58 and 3.38 Hz), 8.16 (2H, s), 8.15–8.17 (2H, m), 7.92 (2H, dd,  $J$  = 8.73 and 1.92 Hz), 7.84 (2H, d,  $J$  = 8.75), 7.82 (2H, d,  $J$  = 1.60 Hz), 7.56 (2H, ddd,  $J$  = 7.60, 6.69 and 0.91 Hz), 7.46–7.52 (8H, m), 7.45 (2H, d,  $J$  = 1.80 Hz), 7.42 (2H, s), 7.38–7.41 (2H, m), 7.30 (2H, dd,  $J$  = 8.10 and 0.95 Hz), 7.28 (2H, d,  $J$  = 6.80 Hz), 7.17–7.25 (6H, m), 7.10–7.13 (2H, m), 7.06–7.09 (2H, m), 7.00–7.04 (2H, m), 3.96 (4H, t,  $J$  = 6.87 Hz), 3.74 (3H, s), 3.72 (3H, s), 3.69 (3H, s), 3.67 (3H, s), 1.70 (4H, quin,  $J$  = 7.29 Hz), 1.40 (4H, quin,  $J$  = 7.46 Hz), 1.24–1.28 (8H, m), 0.83 (6H, t,  $J$  = 6.90 Hz).  $^{13}\text{C}$  NMR (125 MHz,  $\text{DMSO-}d_6$ )  $\delta$  (ppm) = 163.7, 158.5, 157.4, 157.3, 157.3, 152.4, 149.1, 148.4, 141.7, 135.6, 135.2, 135.2, 132.2, 131.8, 131.6, 131.2, 129.3, 129.0, 128.8, 128.0, 127.0, 126.5, 126.2, 125.5, 125.2, 125.1, 123.1, 122.6, 122.6, 120.1, 119.9, 119.9, 119.8, 119.7, 119.5, 119.3, 119.2, 116.0, 119.0, 116.9, 116.7, 116.7, 115.5, 111.5, 111.4, 55.5, 55.4, 46.9, 30.7, 25.9, 25.6, 22.0, 13.7. ESI MS: 879.3  $[\text{M-H}]^-$ .

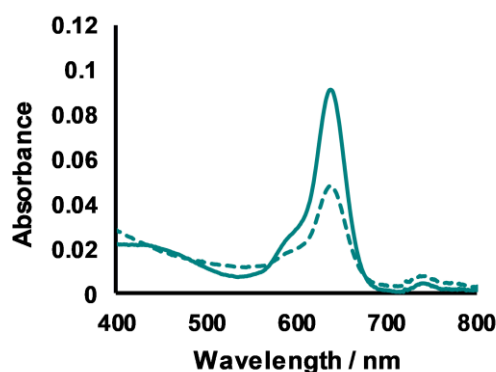

**Figure S1.** Absorption spectra of **1** in THF measured before (solid line) and after (dashed line) the dye deposition. The decrease in the absorbance indicates the adsorption of the substances onto Pt/HPT500.

**Table S1.** Assignment of the electronic transitions and oscillator strength ( $f$ ) calculated for **1** and **2** using the B3LYP/6-31G(d,p) basis set.

| Dye      | State                 | $\lambda$ (calcd.) / nm | $f$ / a.u. | MO Transition Assignment                                                                                 |
|----------|-----------------------|-------------------------|------------|----------------------------------------------------------------------------------------------------------|
| <b>1</b> | $S_0 \rightarrow S_1$ | 559                     | 0.6125     | HOMO $\rightarrow$ LUMO (22.8%) <sup>a</sup><br>HOMO $\rightarrow$ LUMO+1 (25.3%)                        |
|          | $S_0 \rightarrow S_2$ | 540                     | 0.3873     | HOMO-1 $\rightarrow$ LUMO (2.3%)<br>HOMO $\rightarrow$ LUMO (23.5%)<br>HOMO $\rightarrow$ LUMO+1 (24.1%) |
|          | $S_0 \rightarrow S_3$ | 486                     | 0.1609     | HOMO-1 $\rightarrow$ LUMO (46.3%)<br>HOMO $\rightarrow$ LUMO (2.8%)                                      |
|          | $S_0 \rightarrow S_4$ | 482                     | 0.2078     | HOMO-1 $\rightarrow$ LUMO+1 (46.9%)                                                                      |
| <b>2</b> | $S_0 \rightarrow S_1$ | 415                     | 0.7706     | HOMO $\rightarrow$ LUMO (49.3%)                                                                          |

<sup>a</sup>(CI coefficient)<sup>2</sup>  $\times$  100%

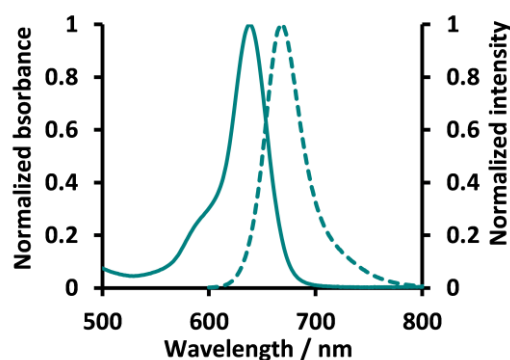

**Figure S2.** Absorption (solid line) and fluorescence (dashed line) spectra of **1** in THF (5  $\mu$ M), showing the intersection at  $\lambda = 654$  nm, which afforded the zeroth-zeroth transition energy  $E_{0-0}$  1.89 eV.

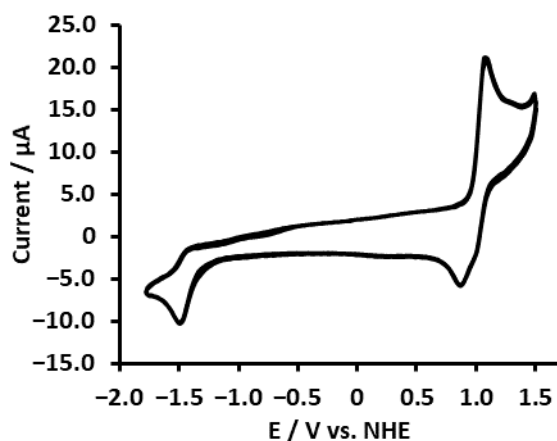

**Figure S3.** Cyclic voltammogram of **2** in THF (0.5 mM) in deaerated THF-CH<sub>3</sub>CN (3:2 v/v) containing 0.1 M TBAPF<sub>6</sub> electrolyte.

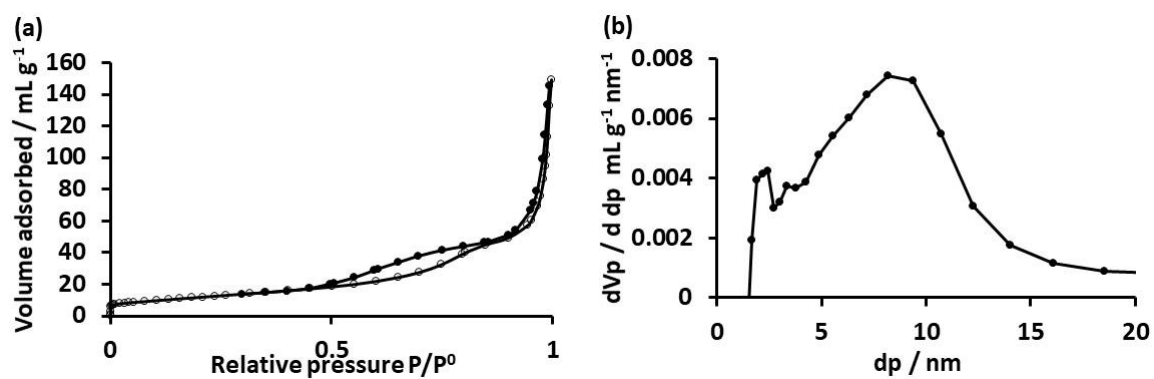

**Figure S4.** (a) Nitrogen adsorption/desorption isotherms and (b) BJH plot of the HPT500.

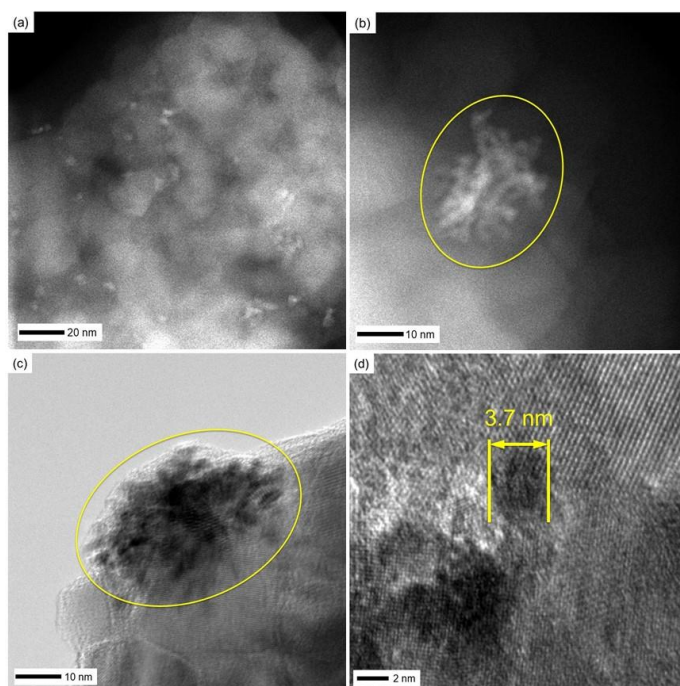

**Figure S5.** (a) and (b) High angle annular dark field scanning transmission electron microscopy (HAADF-STEM) images. (c) and (d) TEM images of Pt/HPT500.

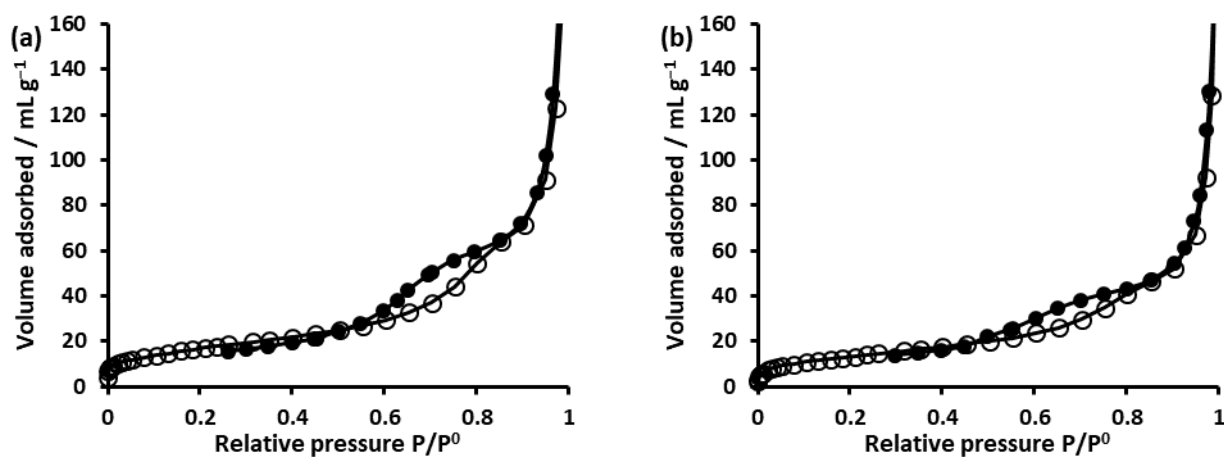

**Figure S6.** Nitrogen adsorption/desorption isotherms of Pt/HPT500 (a) and Pt/HPT500/1 (b).

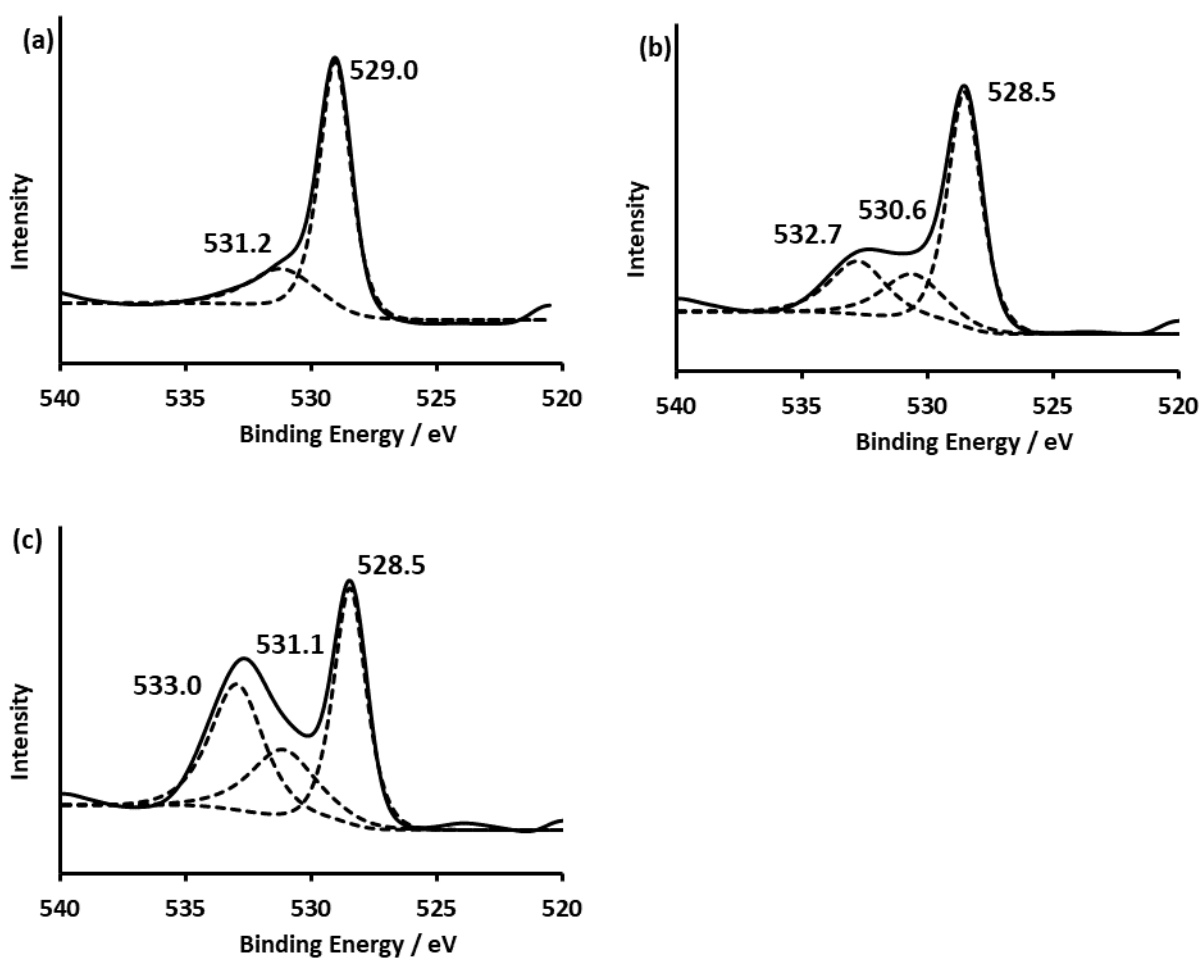

**Figure S7.** O 1s peak (solid line) of Pt/HPT500 (a), Pt/HPT500/1 (b), and Pt/HPT500/2 (c). Dashed line is one deconvoluted in symmetric gaussian curves.

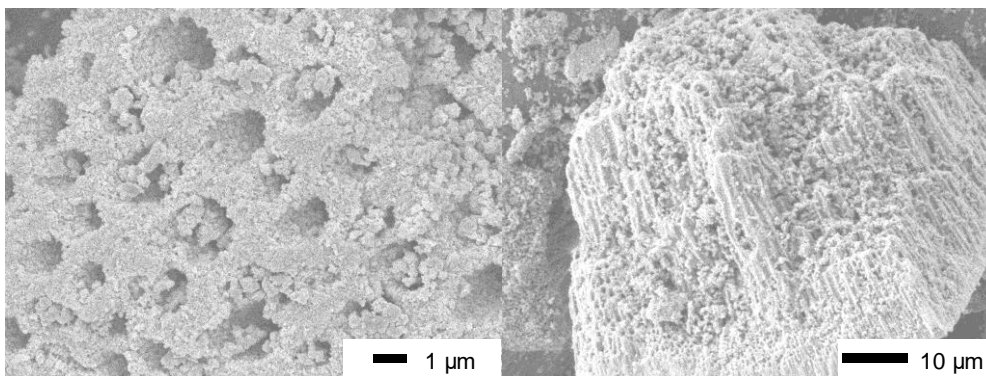

**Figure S8.** FE-SEM image of Pt/HPT500/1.

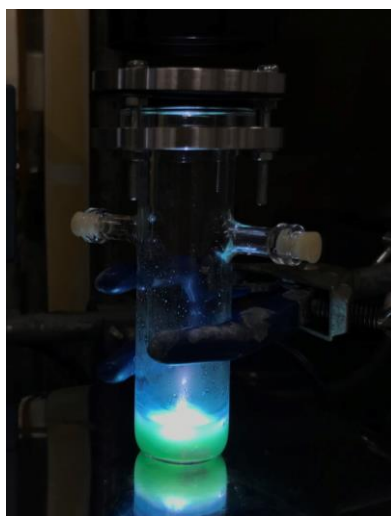

**Figure S9.** A photograph of the photoreactor of the dye sensitized photocatalyst Pt/TiO<sub>2</sub>/1 in phosphate buffer solution containing ascorbic acid (0.5 M) as the sacrificial electron donor. A 300 W Xenon lamp with a light guide was used to irradiate the photocatalyst from the top side of the photoreactor.

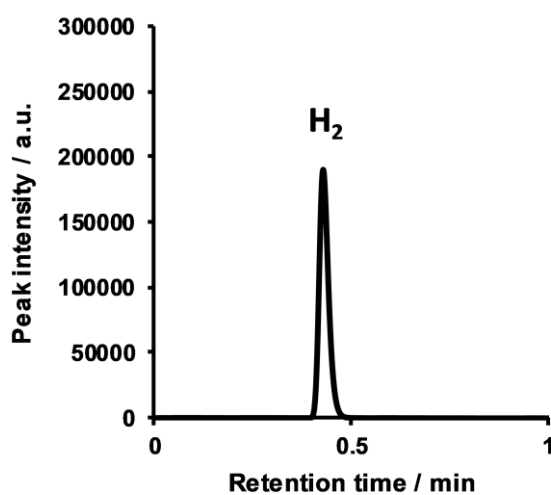

**Figure S10.** Gas chromatogram showing the hydrogen peak at 0.42 min retention time taken after 1 h photolysis of Pt/HPT500/1 at pH 3.6.

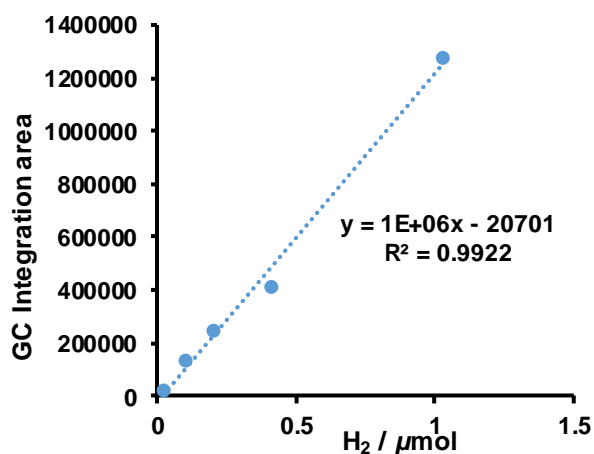

**Figure S11.** Calibration curve used for the calculation the amount of produced hydrogen

**Table S2.** Photocatalytic activity of Pt/HPT500/1 and Pt/HPT500/2.

| Time / h | Pt/HPT500/1           |      |                       |      |                       |      | Pt/HPT500/2           |     |                       |      |                       |      |
|----------|-----------------------|------|-----------------------|------|-----------------------|------|-----------------------|-----|-----------------------|------|-----------------------|------|
|          | 1 <sup>st</sup> cycle |      | 2 <sup>nd</sup> cycle |      | 3 <sup>rd</sup> cycle |      | 1 <sup>st</sup> cycle |     | 2 <sup>nd</sup> cycle |      | 3 <sup>rd</sup> cycle |      |
|          | TON                   | TOF  | TON                   | TOF  | TON                   | TOF  | TON                   | TOF | TON                   | TOF  | TON                   | TOF  |
| 1        | 2340                  | 2340 | 1990                  | 1990 | 1170                  | 1170 | 650                   | 650 | 240                   | 240  | 190                   | 190  |
| 2        | 3170                  | 1590 | 3060                  | 1530 | 2030                  | 1020 | 852                   | 426 | 317                   | 159  | 210                   | 105  |
| 3        | 4540                  | 1510 | 4040                  | 1350 | 2540                  | 850  | 1080                  | 360 | 429                   | 143  | 195                   | 65.0 |
| 4        | 5840                  | 1460 | 5190                  | 1300 | 3160                  | 790  | 1290                  | 323 | 480                   | 120  | 397                   | 99.3 |
| 5        | 6460                  | 1290 | 6120                  | 1220 | 3860                  | 770  | 1330                  | 266 | 558                   | 112  | 392                   | 78.4 |
| 6        | 7960                  | 1330 | 7350                  | 1230 | 3560                  | 590  | 1460                  | 243 | 560                   | 93.3 | 460                   | 76.7 |
| 7        | 8880                  | 1270 | 6620                  | 950  | 4310                  | 620  | 1480                  | 211 | 603                   | 86.1 | 580                   | 82.9 |
| 8        | 9710                  | 1210 | 7970                  | 1000 | 4970                  | 620  | 1530                  | 191 | 655                   | 81.9 | 533                   | 66.6 |
| 9        | 9260                  | 1030 | 8630                  | 959  | 5410                  | 600  | 1690                  | 188 | 676                   | 75.1 | 604                   | 67.1 |
| 10       | 11100                 | 1110 | 8650                  | 865  | 5650                  | 570  | 1720                  | 172 | 762                   | 76.2 | 596                   | 59.6 |

<sup>a</sup>Dye loading amount **1** = 18.0 nmol mg<sup>-1</sup>. <sup>b</sup>Dye loading amount **2** = 15.2 nmol mg<sup>-1</sup>.

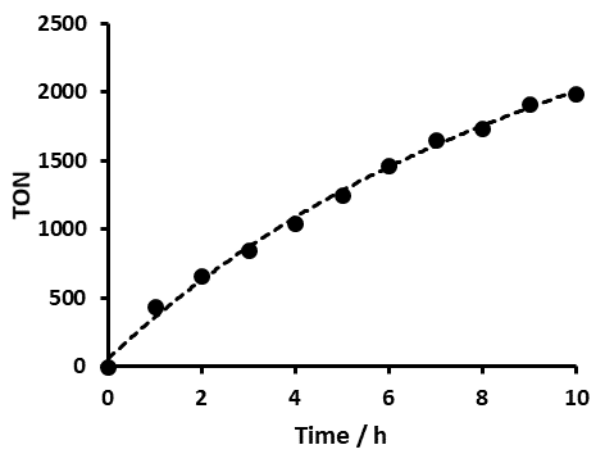

**Figure S12.** Photocatalytic activity of Pt/HPT500/1 in aqueous solution involving ascorbic acid at pH 7.2. Dye loading amount of **1** = 18.0 nmol mg<sup>-1</sup>.

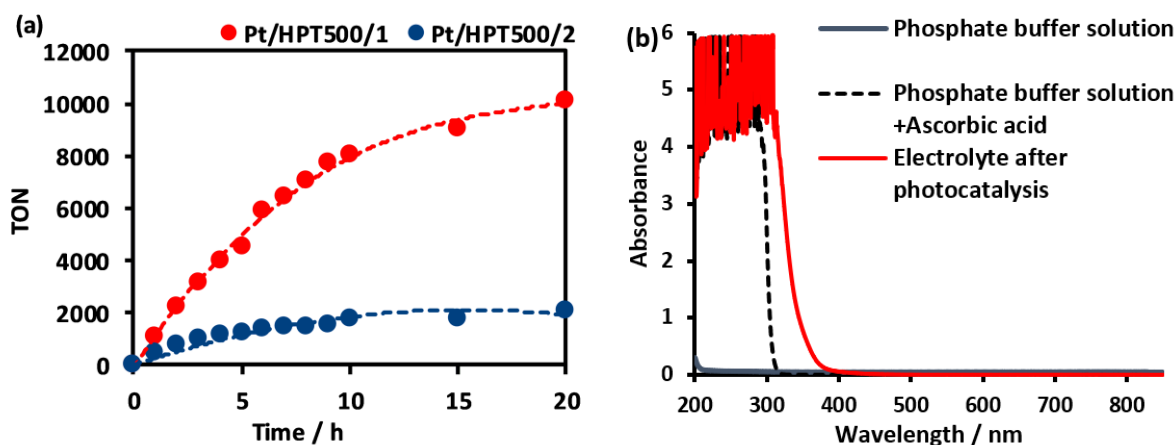

**Figure S13.** (a) Photocatalytic activity of Pt/HPT500/1 under 20-h irradiation. Dye loading amounts of **1** and **2** were  $18.0 \text{ nmol mg}^{-1}$  and  $15.2 \text{ nmol mg}^{-1}$ , respectively. (b) UV-Vis absorption spectra of electrolyte after 20-h photocatalysis using Pt/HPT500/1.

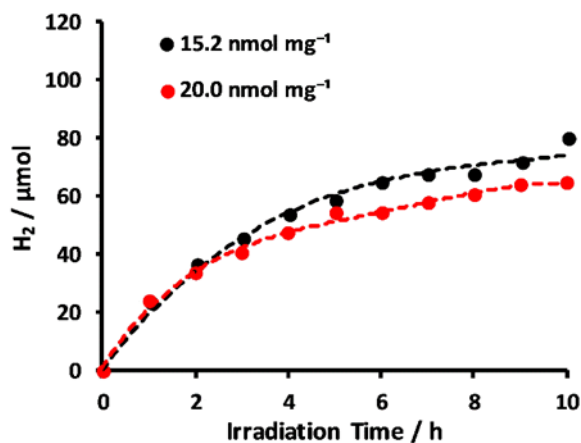

**Figure S14.** Plots of hydrogen evolved over Pt/HPT500/2 upon 10-h irradiation using 300 W Xe lamp ( $\lambda > 400 \text{ nm}$ ,  $100 \text{ mW cm}^{-2}$  light intensity).

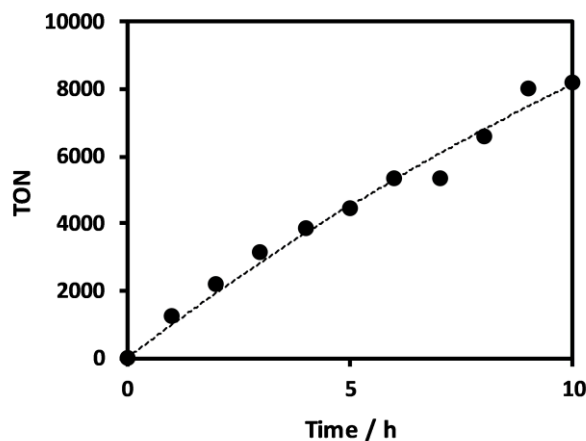

**Figure S15.** Photocatalytic activity of Pt/P25/1 in the presence of ascorbic acid (0.5 M) under  $100 \text{ mW cm}^{-2}$  light irradiation ( $\lambda > 400 \text{ nm}$ ) at pH 3.6. Dye loading amount **1** on P25 =  $30.0 \text{ nmol mg}^{-1}$ .



**Table S3.** Hydrogen production of Pt/HPT500/1, Pt/P25/1, and Pt/ HPT500/2.

| Irradiation time / h | Pt/HPT500/1     |                         |                    | Pt/HPT500/2     |                         |                    | Pt/P25/1        |                         |                    |
|----------------------|-----------------|-------------------------|--------------------|-----------------|-------------------------|--------------------|-----------------|-------------------------|--------------------|
|                      | $\mu\text{mol}$ | $\mu\text{mol g}^{-1a}$ | TON <sup>b,c</sup> | $\mu\text{mol}$ | $\mu\text{mol g}^{-1a}$ | TON <sup>b,d</sup> | $\mu\text{mol}$ | $\mu\text{mol g}^{-1a}$ | TON <sup>b,e</sup> |
| 1                    | 126             | 21000                   | 2340               | 29.7            | 4940                    | 650                | 113             | 18900                   | 1260               |
| 2                    | 171             | 28500                   | 3170               | 38.9            | 6480                    | 852                | 195             | 32500                   | 2170               |
| 3                    | 245             | 40900                   | 4540               | 49.2            | 8200                    | 1080               | 284             | 47400                   | 3160               |
| 4                    | 316             | 52600                   | 5840               | 58.8            | 9800                    | 1290               | 348             | 57900                   | 3860               |
| 5                    | 349             | 58200                   | 6460               | 60.8            | 10100                   | 1330               | 400             | 66700                   | 4450               |
| 6                    | 430             | 71700                   | 7960               | 66.5            | 11100                   | 1460               | 477             | 79500                   | 5300               |
| 7                    | 479             | 79900                   | 8880               | 67.8            | 11300                   | 1480               | 479             | 79900                   | 5330               |
| 8                    | 524             | 87400                   | 9710               | 69.9            | 11600                   | 1530               | 593             | 98900                   | 6590               |
| 9                    | 500             | 83300                   | 9260               | 76.9            | 12800                   | 1690               | 722             | 120000                  | 8020               |
| 10 <sup>f</sup>      | 597             | 99500                   | 11100              | 78.6            | 13100                   | 1720               | 737             | 123000                  | 8180               |

<sup>a</sup>Activity = Photocatalytic activity of the system is defined as number of micromole of H<sub>2</sub> evolved per gram of photocatalyst ( $\mu\text{mol H}_2 / \text{g photocatalyst}$ ). <sup>b</sup>TON =  $2 \times \text{mol H}_2 / \text{mol dye}$ . <sup>c</sup>Dye loading amount **1** = 18.0 nmol mg<sup>-1</sup>. <sup>d</sup>Dye loading amount **2** on HPT500 = 15.2 nmol mg<sup>-1</sup>. <sup>e</sup>Dye loading amount **1** on P25 = 30.0 nmol mg<sup>-1</sup>.

<sup>f</sup>The experiment was terminated since the amount of hydrogen production reached the plateau.

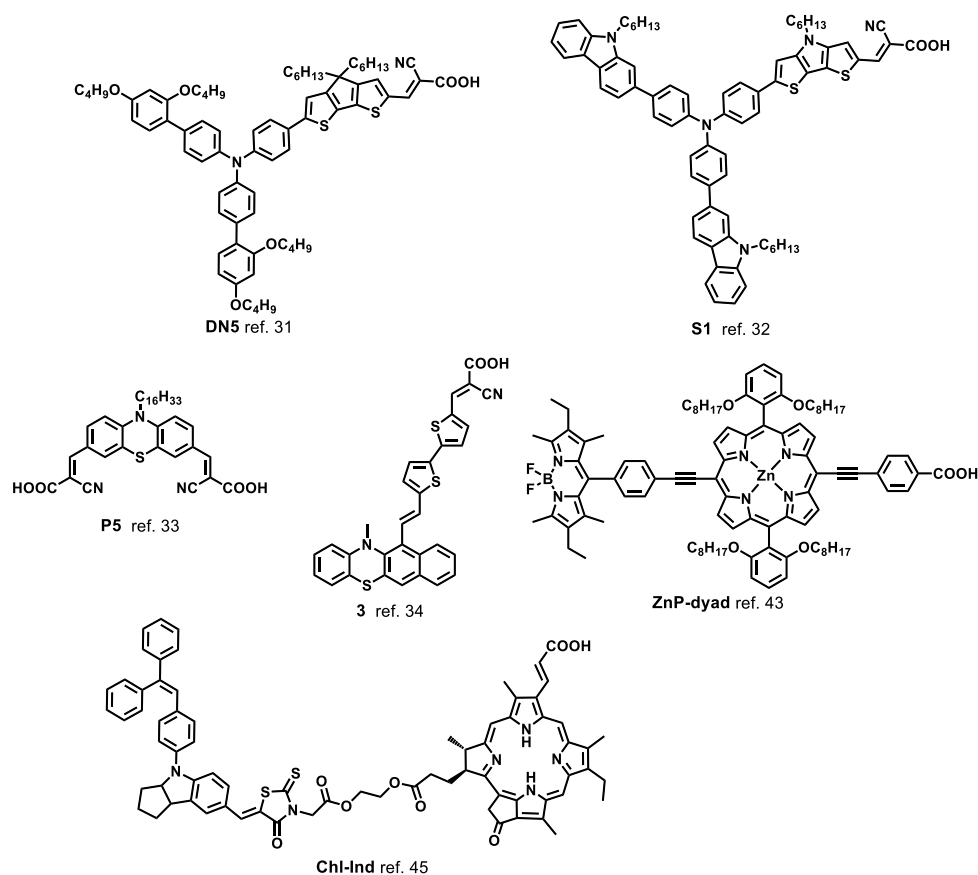**Figure S16.** Reported metal-free organic photosensitizers for DSP system.

**Table S4.** The hydrogen production of Pt/HPT500/1 using ascorbic acid (0.5 M) under light irradiation 100 mW cm<sup>-2</sup> ( $\lambda > 400$ ) nm in comparison with the other metal-free organic photosensitizers.

| Photocatalyst                     | Cocatalyst  | $\lambda_{\text{max}} (\epsilon) /$<br>nm (M <sup>-1</sup> cm <sup>-1</sup> ) | Irradiation<br>time/ h | AQY / %        | TON <sup>a</sup> | TOF <sup>b</sup> | Activity <sup>c</sup><br>/ $\mu\text{mol g}^{-1}$ | Activity <sup>d</sup><br>/ $\mu\text{mol g}^{-1}$ | Ref. |
|-----------------------------------|-------------|-------------------------------------------------------------------------------|------------------------|----------------|------------------|------------------|---------------------------------------------------|---------------------------------------------------|------|
| Pt/HPT500/1                       | Pt 0.42 wt% | 638 (123 000)                                                                 | 10                     | 3.56 (670 nm)  | 11 100           | 1110             | 99 500                                            | 23 700 000                                        |      |
| Pt/TiO <sub>2</sub> /DN5          | Pt 1 wt%    | 542 (66 778)                                                                  | 6                      | — <sup>e</sup> | 1 864            | — <sup>e</sup>   | — <sup>e</sup>                                    | — <sup>e</sup>                                    | 31   |
| Pt/TiO <sub>2</sub> /S1           | Pt 0.5 wt%  | 531 (77 760)                                                                  | 48                     | 12.3 (520 nm)  | 10 200           | 213              | — <sup>e</sup>                                    | 478 000                                           | 32   |
| Pt/TiO <sub>2</sub> /P5           | Pt 1 wt%    | 463 (13 500)                                                                  | 5                      | — <sup>e</sup> | 1 026            | 205              | — <sup>e</sup>                                    | — <sup>e</sup>                                    | 33   |
| Pt/TiO <sub>2</sub> /3            | Pt 1 wt%    | 443 (22 239)                                                                  | 16                     | 1.65 (420 nm)  | 4460             | 278              | — <sup>e</sup>                                    | — <sup>e</sup>                                    | 34   |
| Pt/TiO <sub>2</sub> /ZnP-dyad     | Pt 0.5 wt%  | 659 (48 100)                                                                  | 120                    | 2.59 (556 nm)  | 12 800           | 107              | — <sup>e</sup>                                    | 173 000                                           | 43   |
| Pt/TiO <sub>2</sub> (P25)/Chl-Ind | Pt 1 wt%    | 380-750                                                                       | 6                      | 1.27 (420 nm)  | 1 044            | — <sup>e</sup>   | 4 176                                             | — <sup>e</sup>                                    | 45   |

<sup>a</sup> TON =  $2 \times \text{mol H}_2 / \text{mol dye}$ . <sup>b</sup> TOF = TON / irradiation time (h). <sup>c</sup> Activity = Photocatalytic activity of the system is defined as number of micromole of H<sub>2</sub> evolved per gram of photocatalyst ( $\mu\text{mol H}_2 / \text{g photocatalyst}$ ).

<sup>d</sup> Activity = Initial photocatalytic activity of the system is defined as number of micromole of H<sub>2</sub> evolved per gram of platinum loaded ( $\mu\text{mol H}_2 / \text{g Pt}$ ). <sup>e</sup> No data provided in the reference.

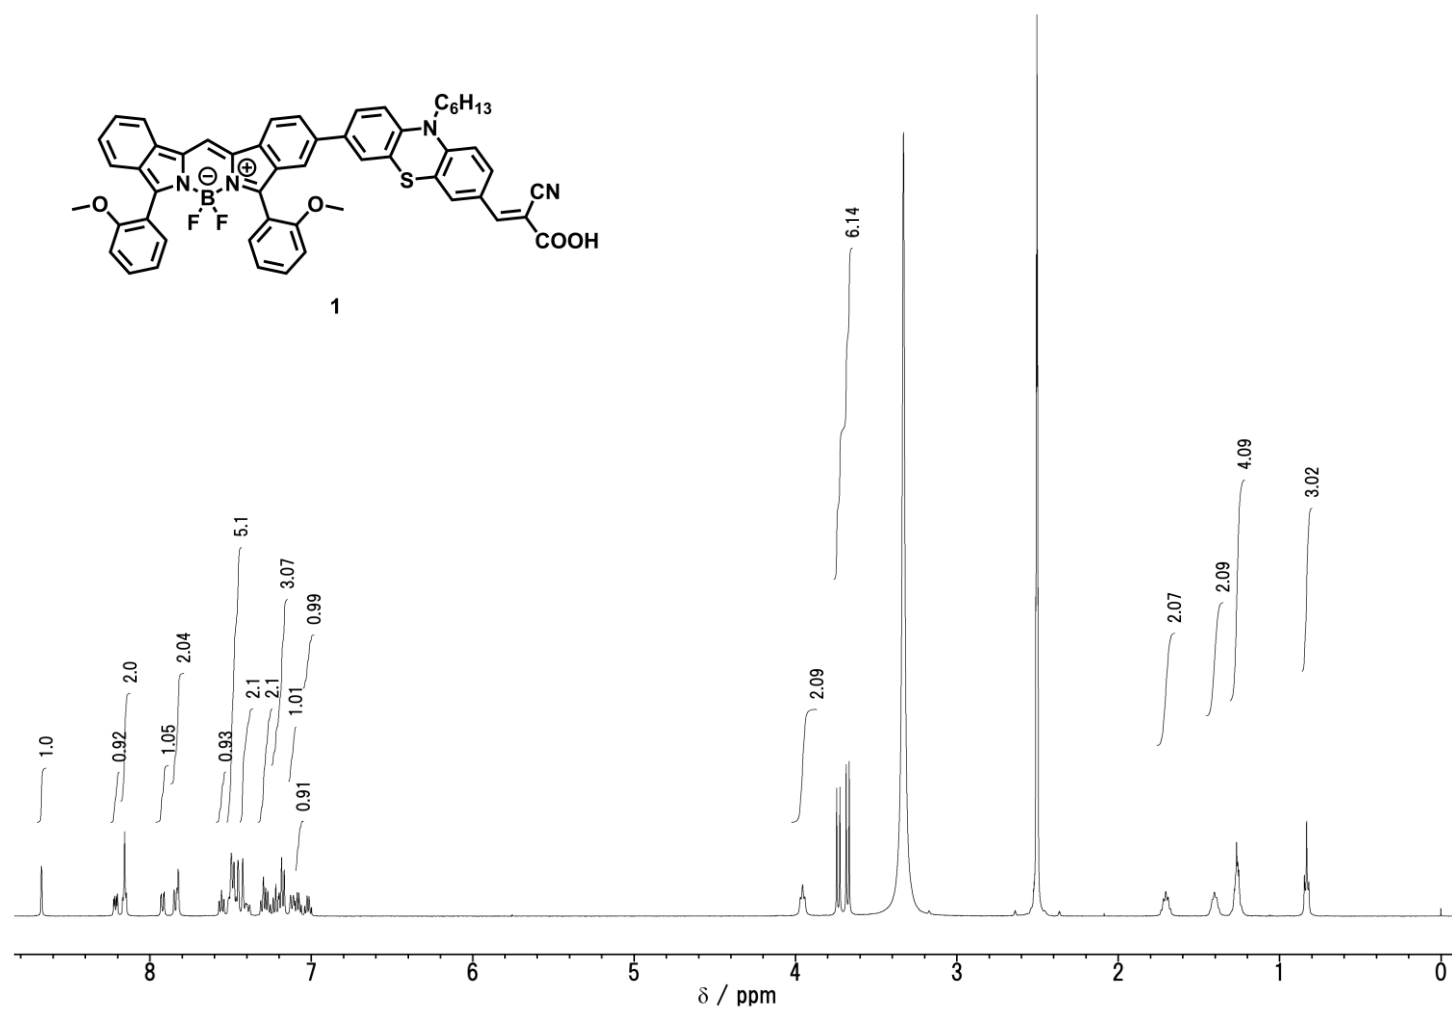

**Figure S17.**  $^1\text{H}$  NMR spectrum of **1** in DMSO- $d_6$ .

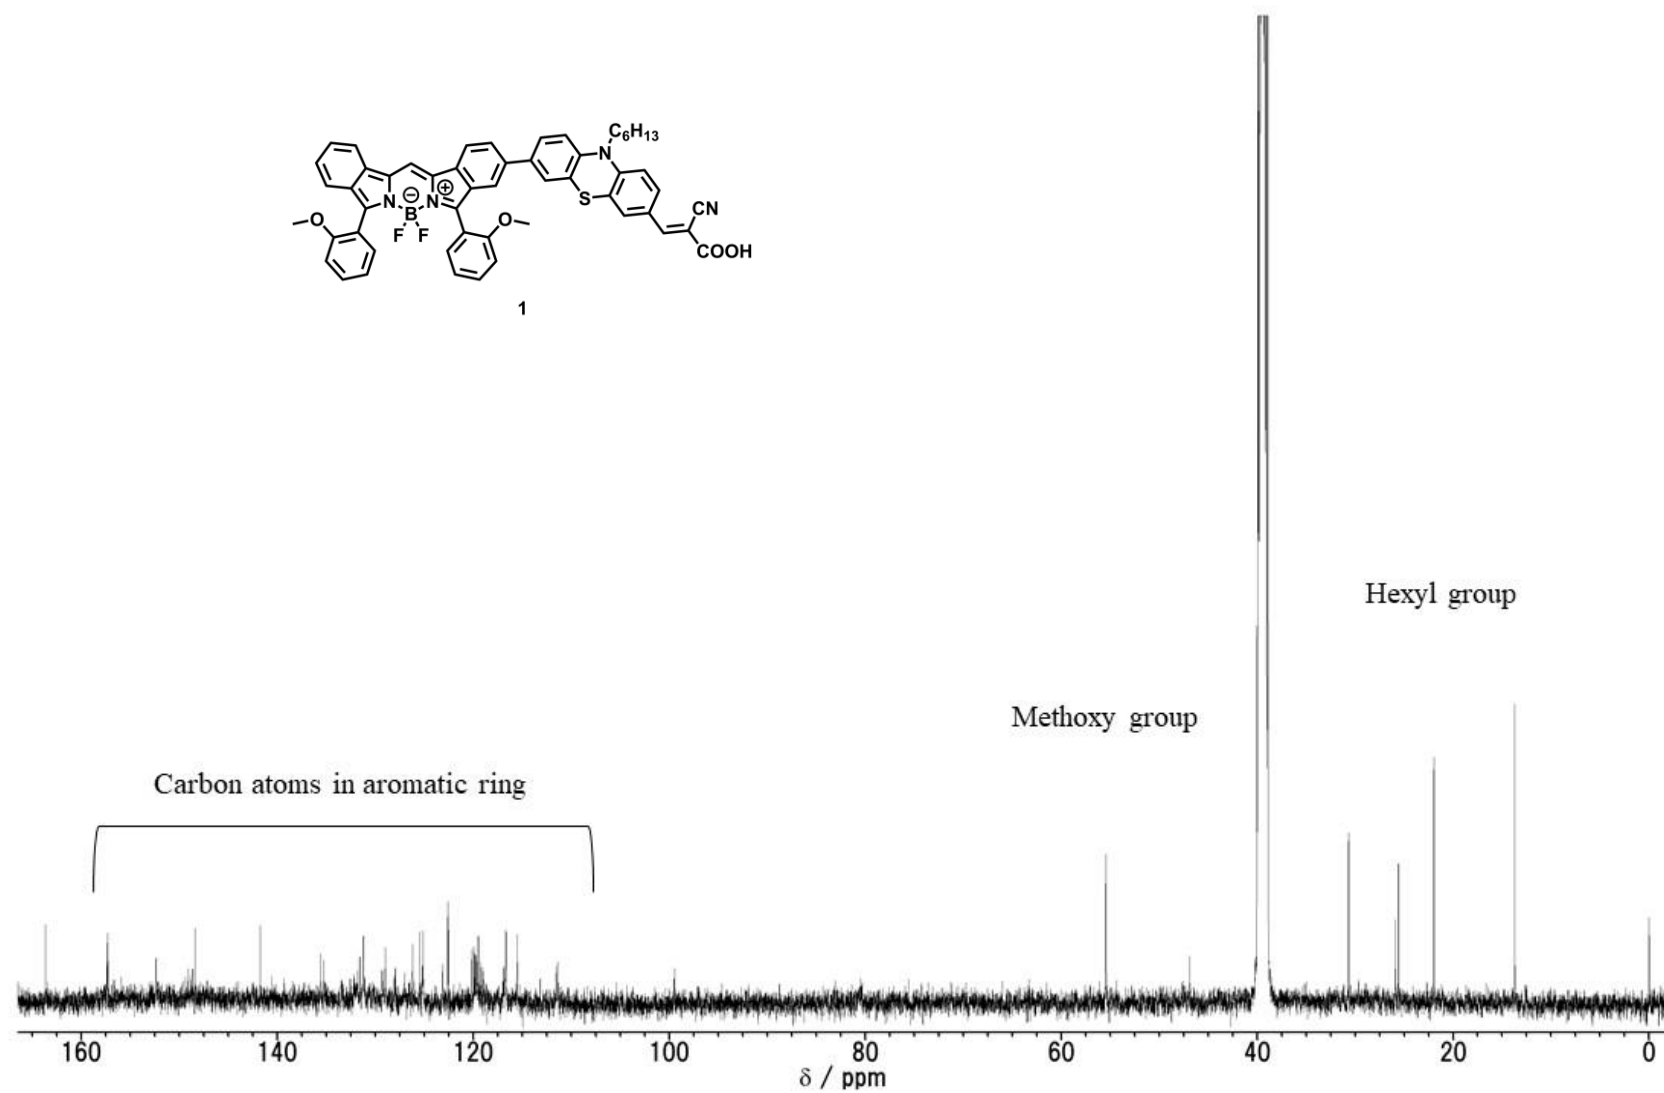

**Figure 18.**  $^{13}\text{C}$  NMR spectrum of **1** in  $\text{DMSO}-d_6$ .

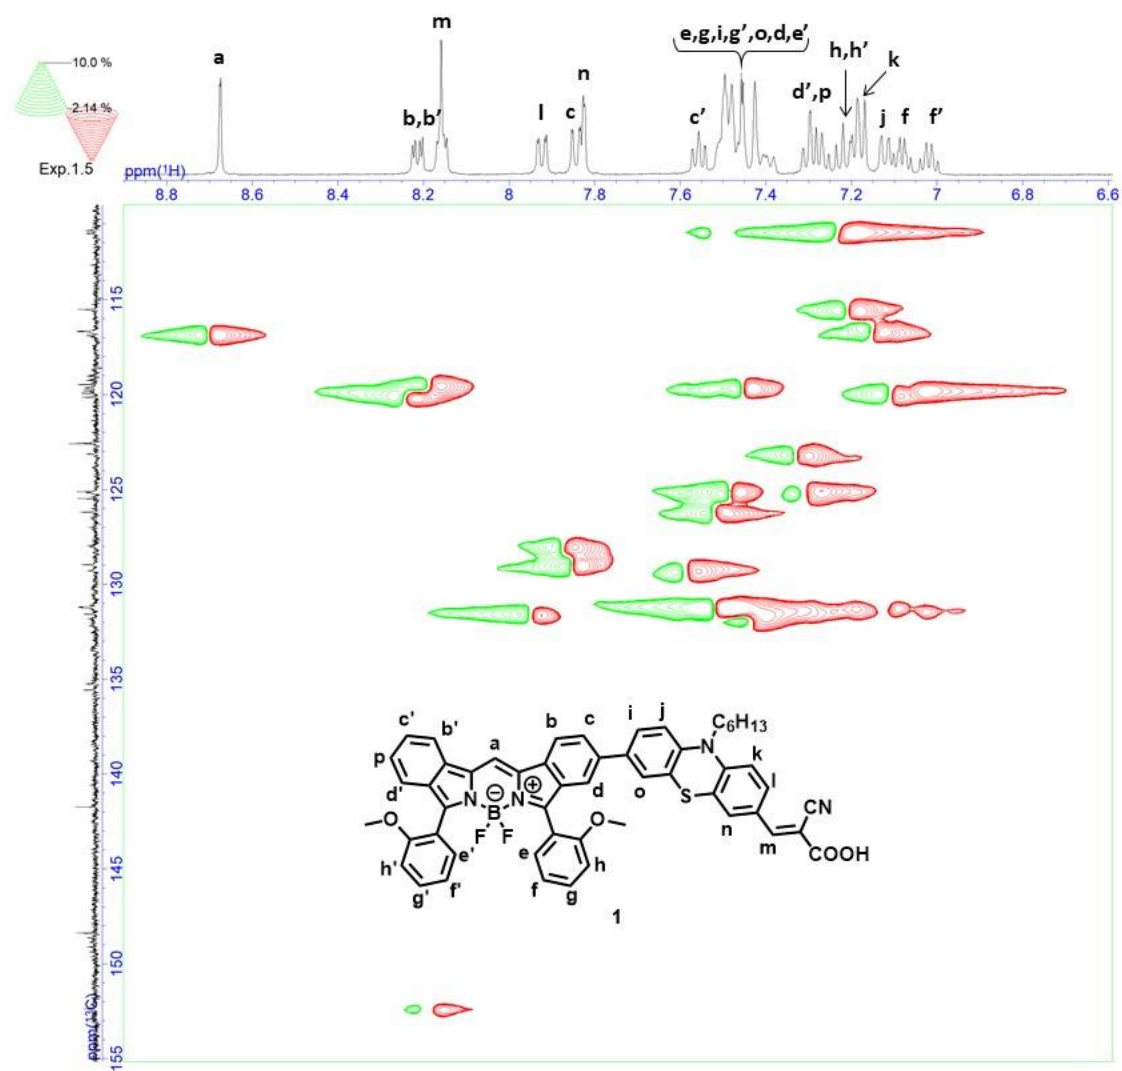

**Figure 19.**  $^1\text{H}$ - $^{13}\text{C}$  HSQC spectrum of **1** in  $\text{DMSO}-d_6$  in low magnetic field.

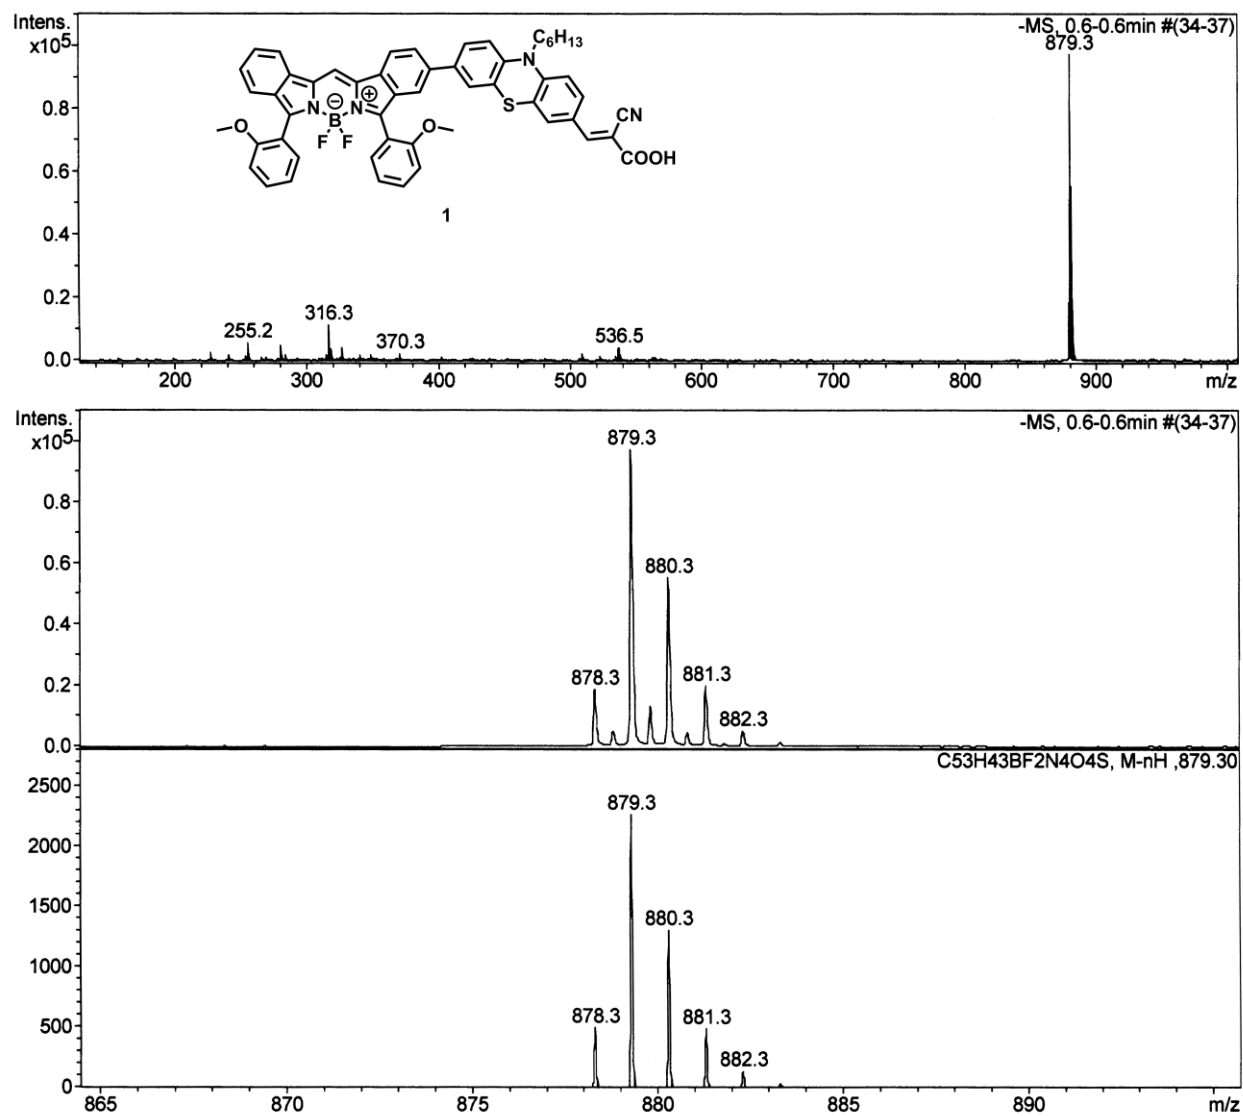

**Figure S20.** ESI MS (negative ion mode) of **1**.
